# Supplementary material
Source: ML conference proceedings conference paper supplement (https://openreview.net/forum?id=Q6zd1hr7sD)
Supplement: supplementary_material [file attachment]

---

# Unified 3D Segmenter As Prototypical Classifiers

## Appendix

---

Zheyun Qin<sup>1\*</sup>, Cheng Han<sup>2\*</sup>, Qifan Wang<sup>3</sup>, Nie Xiushan<sup>4</sup>, Yilong Yin<sup>1†</sup>, Xiankai Lu<sup>1†</sup>

<sup>1</sup>Shandong University, <sup>2</sup>Rochester Institute of Technology, <sup>3</sup>Meta AI, <sup>4</sup>Shandong Jianzhu University

This appendix contains additional details for the NeurIPS 2023 submission, organized as follows:

- §1 provides the pseudo code of PROTOSEG.
- §2 offers more details about instance segmentation and panorama segmentation.
- §3 introduces experimental settings and more quantitative results on segmentation.
- §4 depicts more studies regarding the ad-hoc explainability of PROTOSEG.
- §5 explores more ablation experiments.
- §6 plots qualitative semantic, instance segmentation results.
- §7 discusses our limitations, social impact and points out several directions of future work.

## 1 Pseudo Code of PROTOSEG and Code Release

The pseudo-code of PROTOSEG is given in Algorithm 1. To guarantee reproducibility, our full implementation shall be publicly released upon paper acceptance.

## 2 Application of PROTOSEG in Instance and Panorama Segmentation

For these tasks, we additionally learn fine-grained prototypes  $\mathbf{P}^{c,o} \in \mathbb{R}^{D \times T}$ ,  $\mathbf{P}^c \in \mathbb{R}^{T \times K}$ , where  $\mathbf{p}_t^{c,o} \in \mathbb{R}^D$  denotes the center of the  $t^{\text{th}}$  sub-cluster (property) of training point samples belonging to instance  $o$  of class  $c$ . Similarity to Eq.5, we make predictions by comparing point embedding  $\mathbf{e}_i \in \mathbb{R}^D$ , with prototype  $\mathbf{p}_t^{c,o}$  and assigning the corresponding prototype’s class as the response:

$$p(c, o | \mathbf{x}_i) = \frac{\exp(-d_{\mathbf{e}_i, \mathbf{p}_t^{c,o}})}{\sum_{c'=1, o'=1}^{C, O} \exp(-d_{\mathbf{e}_i, \mathbf{p}_t^{c',o'}})}, \text{ with } d_{\mathbf{e}_i, \mathbf{p}_t^{c,o}} = \arg \min \{ \langle \mathbf{e}_i, \mathbf{p}_t^{c,o} \rangle \}_{t=1}^T, \quad (1)$$

where the negative cosine distance measure  $\langle \cdot, \cdot \rangle$  is defined as  $\langle \mathbf{e}_i, \mathbf{p}_t^{c,o} \rangle = -\mathbf{e}_i^\top \mathbf{p}_t^{c,o}$ .

To get the informative prototype that can represent the properties of the instance and class, we learn a fine-grained permutation matrix  $M$  for prototype assignment and update. Similarity to Eq.6, we aim to maximize the similarities  $J(M)$ :

$$\max_M \mathcal{J}(M) = \text{Tr}((M^{c,o})^\top (\mathbf{P}^{c,o})^\top \mathbf{E}^c), \quad (2)$$

where  $\text{Tr}(\cdot)$  denotes the matrix trace,  $M^{c,o} = \{\mathbf{m}_{t,i}^{c,o}\}_{t,i=1}^{T, N_c} \in \{0, 1\}^{T \times N_c}$  is a point-to-prototype permutation matrix that denotes the association between point and prototype,  $\mathbf{m}_{t,i}^{c,o} \in \{0, 1\}$  denotes the one-hot assignment vector that assigns the point sample  $\mathbf{x}_i$  to the prototype  $t$  of instance  $o$  of class  $c$ . The association and update of prototypes follow Section 3.2. Instance-level supervision using a cross-entropy loss is incorporated into our supervision scheme (Section 3.3).

---

\*Equal contribution. †Corresponding authors.

### 3 More Experiments on Point Cloud Segmentation

In this section, we show experimental settings on different segmentation tasks and datasets in table. 1, as well as comparisons with more methods for semantic and instance segmentation tasks in tables 2-5.

Table 1: Experimental Settings on different segmentation tasks and datasets. We denote Lr=initial learning rate.

| Task          | Dataset           | Lr                 | Optimizer | Decay | # K | # O | # T | # $\mu$ | # $\tau$ | # $\kappa$ | # $\alpha$ | # $\beta$ |
|---------------|-------------------|--------------------|-----------|-------|-----|-----|-----|---------|----------|------------|------------|-----------|
| Semantic Seg. | S3DIS [1]         | $1 \times 10^{-3}$ | AdamW     | 0.5   | 10  | -   | -   | 0.999   | 0.1      | 0.05       | 0.01       | 0.01      |
| Semantic Seg. | ScanNet V2 [2]    | $1 \times 10^{-3}$ | AdamW     | 0.02  | 8   | -   | -   | 0.999   | 0.1      | 0.05       | 0.02       | 0.01      |
| Semantic Seg. | SemanticKITTI [3] | $1 \times 10^{-3}$ | AdamW     | 0.2   | 8   | -   | -   | 0.999   | 0.1      | 0.05       | 0.01       | 0.01      |
| Instance Seg. | S3DIS [1]         | $1 \times 10^{-3}$ | AdamW     | 0.02  | 10  | 15  | 15  | 0.99    | 0.1      | 0.03       | 0.05       | 0.02      |
| Instance Seg. | ScanNet V2 [2]    | $1 \times 10^{-2}$ | AdamW     | 0.005 | 8   | 60  | 12  | 0.999   | 0.1      | 0.05       | 0.1        | 0.05      |
| Panoptic Seg. | SemanticKITTI [3] | $1 \times 10^{-3}$ | AdamW     | 0.01  | 8   | 50  | 12  | 0.999   | 0.1      | 0.05       | 0.1        | 0.01      |

### 4 Additional Study of Ad-hoc Explainability

In our principal study on Ad-hoc explainability (see §5.4 in the main paper), we maintained the use of PROTOSEG with Transformer [27] as the encoder, adhering to the same parameter settings as in the optimal model, across a training span of 180 epochs. During the initial 150 epochs, we employed standard training procedures, wherein class sub-centroids were computed as prototypes. Subsequent to this phase, each sub-centroid was anchored to its closest training points, guided by the cosine similarity of the embeddings. In the concluding 30 epochs, the prototypes underwent updates exclusively in accordance with the embeddings of their corresponding anchored training points. As a result, the prototype instance depicted in Fig.3 of the main paper represents the partial point cloud that is most similar to the class sub-centroids. This approach allowed us to derive a more interpretative version of PROTOSEG, denoted as PROTOSEG<sup>†</sup>.

**Performance with Improved Interpretability.** We then present the performance score of our PROTOSEG, evaluated based on the interpretable class representatives on S3DIS [1] Area 5. As illustrated in Table 6, the strategy of enforcing the prototypes to be real training points results in only a minor performance decline (OAcc: 92.2%  $\rightarrow$  91.2%). However, this slight reduction is compensated by the advantage of enhanced model interpretability. Even more notably, our more explainable variant, PROTOSEG<sup>†</sup>, surpasses the performance of the standard Transformer+MLP model (OAcc: 91.2%  $\rightarrow$  90.8%). This result attests to the effectiveness of our method in improving both the performance and interpretability of semantic segmentation models.

#### Explain Inner Decision-Making Mode based on *IF* ...

**Then Rules.** With the simple Nearest Centroids mechanism, we can use the representative points to form a set of *IF* ... *Then* rules [56], so as to intuitively interpret the inner decision-making mode of PROTOSEG for human users. In particular, let  $\hat{E}$  denote a sub-centroid point for class  $c$ ,  $\check{E}_{1:T}$  representative points for all the other classes, and  $E$  is a query point. One linguistic logical *IF* ... *Then* rule can be generated for  $\hat{E}$ :

$$IF ([E, \hat{E}] > [E, \check{E}_1] AND [E, \hat{E}] > [E, \check{E}_2] AND \dots AND [E, \hat{E}] > [E, \check{E}_T]) THEN (class c), \quad (3)$$

where  $[\cdot, \cdot]$  stands for similarity, given by PROTOSEG. The final rule for class  $c$  is created by combining all the rules of  $K$  sub-centroid points  $\hat{E}_{1:K}$  of class  $c$ :

$$\begin{aligned}
 &IF ([E, \hat{E}_1] > [E, \check{E}_1] AND \dots AND [E, \hat{E}_1] > [E, \check{E}_T]) \\
 &ELIF ([E, \hat{E}_2] > [E, \check{E}_2] AND \dots AND [E, \hat{E}_2] > [E, \check{E}_T]) \\
 &ELIF \dots ELIF ([E, \hat{E}_K] > [E, \check{E}_K] AND \dots AND [E, \hat{E}_K] > [E, \check{E}_T]) THEN (class c). \quad (4)
 \end{aligned}$$

Please note that the interpretability of a classifier mainly comes from its decision-making mode, *i.e.*, a test sample is directly classified into the class with the closest centroids instead of the training strategy or datasets. Therefore, *IF* ... *Then* applies to both indoor (S3DIS [1], ScanNet V2 [2]) and outdoor datasets (SemanticKITTI [3]).

Table 6: Comparisons of semantic segmentation on S3DIS [1] Area 5.

| Architecture          | OACC (%) $\uparrow$ |
|-----------------------|---------------------|
| PROTOSEG              | 92.2                |
| PROTOSEG <sup>†</sup> | 91.2                |
| Transformer+MLP       | 90.8                |

Table 2: Comparisons of **semantic segmentation** performance on S3DIS [1] Area 5 (see §5.1).

| Method                          | OAcc        | mAcc        | mIoU        |
|---------------------------------|-------------|-------------|-------------|
| PointNet [4] [CVPR'17]          | –           | 49.0        | 41.1        |
| SegCloud [5] [3DV'17]           | –           | 57.4        | 48.9        |
| TanConv [6] [CVPR'18]           | –           | 62.2        | 52.6        |
| PointCNN [7] [NeurIPS'18]       | 85.9        | 63.9        | 57.3        |
| PointWeb [8] [CVPR'19]          | 87.0        | 66.6        | 60.3        |
| HPEIN [9] [CVPR'19]             | 87.2        | 68.3        | 61.9        |
| GACNet [10] [CVPR'19]           | 87.8        | –           | 62.9        |
| PAT [11] [CVPR'19]              | –           | 70.8        | 60.1        |
| ParamConv [12] [CVPR'18]        | –           | 67.0        | 58.3        |
| SPGraph [13] [CVPR'18]          | 86.4        | 66.5        | 58.0        |
| ASIS [14] [CVPR'19]             | 86.9        | 60.9        | 53.4        |
| JSNet [15] [AAAI'20]            | 87.7        | 61.4        | 54.5        |
| GACNet [10] [CVPR'19]           | 87.8        | –           | 62.8        |
| SSP+SPG [16] [CVPR'19]          | 87.9        | 68.2        | 61.7        |
| SegGCN [17] [CVPR'20]           | 88.2        | 70.4        | 63.6        |
| SCF-Net [18] [CVPR'21]          | 88.4        | 71.6        | 82.7        |
| MinkUNet [19] [CVPR'19]         | –           | 71.7        | 65.4        |
| PACov [20] [CVPR'21]            | –           | –           | 66.6        |
| KPCov [21] [ICCV'19]            | –           | 72.8        | 67.1        |
| PointWeb [8] [CVPR'19]          | 87.0        | 66.6        | 60.3        |
| RepSurf-U [22] [CVPR'22]        | 90.2        | 76.0        | 68.9        |
| CBL [23] [CVPR'22]              | 90.6        | 75.2        | 69.4        |
| PTv1 [24] [ICCV'21]             | 90.8        | 76.5        | 70.4        |
| FastPT. [25] [CVPR'22]          | –           | 77.9        | 70.3        |
| PointMixer [26] [ECCV'22]       | –           | 77.4        | 71.4        |
| PTv2 [27] [NeurIPS'22]          | 91.1        | 77.9        | 71.6        |
| StratifiedFormer [28] [CVPR'22] | 91.5        | 78.1        | 72.0        |
| SAT [29] [arXiv'23]             | –           | 78.8        | 72.6        |
| <b>Ours (Area 5)</b>            | <b>92.2</b> | <b>78.6</b> | <b>72.3</b> |

Table 3: Comparisons of **semantic segmentation** with mIoU on ScanNet v2 [2] (see §5.1).

| Method                          | Test        | Val.        |
|---------------------------------|-------------|-------------|
| PointNet++ [30] [NeurIPS'17]    | 55.7        | 53.5        |
| PointEdge [9] [ICCV'19]         | 61.8        | 63.4        |
| 3DMV [31] [ECCV'18]             | 48.4        | –           |
| PanopticFusion [32] [IROS'19]   | 52.9        | –           |
| PointCNN [7] [NeurIPS'18]       | 45.8        | –           |
| PointConv [33] [CVPR'19]        | 66.6        | 61.0        |
| PointASNL [34] [CVPR'20]        | 66.6        | 63.5        |
| JointPointBased [35] [3DV'19]   | 63.4        | 69.2        |
| SegGCN [17] [CVPR'20]           | 58.9        | –           |
| RandLA-Net [36] [CVPR'20]       | 64.5        | –           |
| KPCov [21] [ICCV'19]            | 68.6        | 69.2        |
| RPNet [37] [ICCV'21]            | 68.2        | –           |
| JSENet [38] [ECCV'20]           | 69.9        | –           |
| FusionNet [39] [ECCV'20]        | 68.8        | –           |
| RepSurf-U [22] [CVPR'22]        | 70.2        | –           |
| SparseConvNet [40] [CVPR'18]    | 72.5        | 69.3        |
| PTv1 [24] [ICCV'21]             | –           | 70.6        |
| PointNeXt [41] [NeurIPS'22]     | 71.2        | 71.5        |
| MinkowskiNet [19] [CVPR'19]     | 73.6        | 72.2        |
| MinkUNet [19] [CVPR'19]         | 73.6        | 72.2        |
| StratifiedFormer [28] [CVPR'22] | 73.7        | 74.3        |
| PTv2 [27] [NeurIPS'22]          | 75.2        | 75.4        |
| <b>Ours</b>                     | <b>76.4</b> | <b>76.3</b> |

Table 4: Comparisons of **instance segmentation** performance on S3DIS [1] Area 5 (see §5.2 for more details).

| Method                     | mCov        | mWCov       | mPrec       | mRec        |
|----------------------------|-------------|-------------|-------------|-------------|
| SGPN [42] [CVPR'18]        | 32.7        | 35.5        | 36.0        | 28.7        |
| ASIS [14] [CVPR'19]        | 44.6        | 47.8        | 55.3        | 42.4        |
| JSNet [15] [AAAI'20]       | 48.7        | 51.5        | 62.1        | 46.9        |
| 3D-Bonet [43] [NeurIPS'19] | –           | –           | 57.5        | 40.2        |
| PointGroup [44] [CVPR'20]  | –           | –           | 61.9        | 62.1        |
| MaskGroup [45] [ICME'22]   | –           | –           | 62.9        | 64.7        |
| SSTNet [46] [ICCV'21]      | 42.7        | 59.3        | 65.5        | 64.2        |
| DyCo3D [47] [CVPR'21]      | 63.5        | 64.6        | 64.3        | 64.2        |
| H AIS [48] [ICCV'21]       | 64.3        | 66.0        | <b>71.1</b> | 65.0        |
| DKNet [49] [ECCV'22]       | 64.7        | 65.6        | 70.8        | 65.3        |
| <b>Ours</b>                | <b>66.8</b> | <b>68.4</b> | 69.7        | <b>66.3</b> |

Table 5: Comparisons of **instance segmentation** performance on ScanNet v2 [2] (see §5.2 for more details).

| Module                     | Test        |                   | Val.        |                   |
|----------------------------|-------------|-------------------|-------------|-------------------|
|                            | mAP         | mAP <sub>50</sub> | mAP         | mAP <sub>50</sub> |
| SGPN [42] [CVPR'18]        | –           | –                 | 4.9         | 14.3              |
| GSPN [50] [CVPR'19]        | 19.3        | 37.8              | –           | 30.6              |
| 3D-SIS [51] [CVPR'19]      | –           | 18.7              | 16.1        | 38.2              |
| 3D-Bonet [43] [NeurIPS'19] | –           | –                 | 25.3        | 48.8              |
| MTML [52] [ICCV'19]        | 20.3        | 40.2              | 28.2        | 54.9              |
| 3D-MPA [53] [CVPR'20]      | 35.5        | 61.1              | 35.5        | 59.1              |
| DyCo3D [47] [CVPR'21]      | 39.5        | 64.1              | 35.4        | 57.6              |
| PointGroup [44] [CVPR'20]  | 40.7        | 63.6              | 34.8        | 56.7              |
| MaskGroup [45] [ICME'22]   | 43.4        | 66.4              | 42.0        | 63.3              |
| H AIS [48] [ICCV'21]       | 45.7        | 69.9              | 43.5        | 64.1              |
| OccuSeg [54] [CVPR'20]     | 48.6        | 67.2              | 44.2        | 60.7              |
| SoftGroup [55] [CVPR'22]   | 50.4        | 76.1              | 46.0        | 67.6              |
| SSTNet [46] [ICCV'21]      | 50.6        | 69.8              | <b>49.4</b> | 64.3              |
| <b>Ours</b>                | <b>51.2</b> | <b>78.1</b>       | 47.8        | <b>68.4</b>       |

## 5 Additional Ablation Experiments

**Prototypes number in scenes with different instance numbers.** Our experiments encompassed scenes with varying numbers of instances. We established the number of instance prototypes based on the percentage of training samples for each class. Specifically, in the S3DIS dataset, the training points per class range from 0.2% to 38.8%. We assigned  $K = 1$  to classes with 0.2% to 1% training samples,  $K = 2$  for 1% to 10% samples,  $K = 4$  for 10% to 20% samples,  $K = 6$  for 20% to 30% samples, and  $K = 10$  for classes with over 30% samples. This approach resulted in slightly better performance than using a fixed  $K = 10$  for all classes, as shown in Table 7. However, in our current version, we opted to use  $K = 10$  for all classes for simplicity.

**The effect of the prototypes number on efficiency.** Table 8 highlights the relationship between the number of prototypes and the efficiency of the semantic segmentation task on the S3DIS dataset. We found that the number of prototypes doesn't markedly influence the model's computational efficiency.

Table 7: Ablative studies of prototypes number setting on S3DIS [1] Area 5.

| $K$ range    | S3DIS mIoU |
|--------------|------------|
| unique value | 72.3       |
| [1, 10]      | 72.4       |

Table 8: Ablative studies of prototypes number and efficiency on S3DIS [1] Area 5.

| # Prototype | Training speed | Inference speed |
|-------------|----------------|-----------------|
| $K = 1$     | 16.6 h         | 400 ms          |
| $K = 5$     | 16.6 h         | 402 ms          |
| $K = 10$    | 16.6 h         | 404 ms          |
| $K = 20$    | 16.7 h         | 420 ms          |
| $K = 50$    | 16.7 h         | 430 ms          |

## 6 Qualitative Results on Point Cloud Segmentation

Figs. 1-4 illustrate a few representative visual examples of semantic and instance segmentation results on S3DIS [1] and ScanNet V2 [2] datasets, respectively.

## 7 More systemic insight

**Limitation.** Despite the robustness of our method, one limitation is the necessity of a Sinkhorn-Knopp step during the training process (Eq.10), thereby introducing an the additional time complexity  $\tilde{O}(\frac{n^2}{\epsilon^3})$ . It should be noted that in real-world implementation, this procedure contributes only a marginal computational load with a few iterations ( $S = 3$  in Algorithm 1), requiring approximately 2.5 milliseconds to segregate 10,000 points into  $K = 10$  prototypes.

We have compared our approach’s mIoU scores, training speed, and inference speed with the baseline model PTv2 [27] using the S3DIS dataset, as shown in Table 9. The inference speed, averaged over the validation set, was measured on an NVIDIA RTX A100 GPU. Our findings indicate that introducing prototype updates results in only a roughly  $\sim 4\%$  delay during training yet leads to significant performance improvements. Notably, while the number of parameters and GFLOPs remain comparable, our method achieves a faster inference speed, mainly because there is no added computational overhead during the inference phase.

**Social Impact.** On the upside, our method shows considerable promise for applications like autonomous vehicles, medical imaging. Nonetheless, it’s crucial to recognize potential drawbacks.

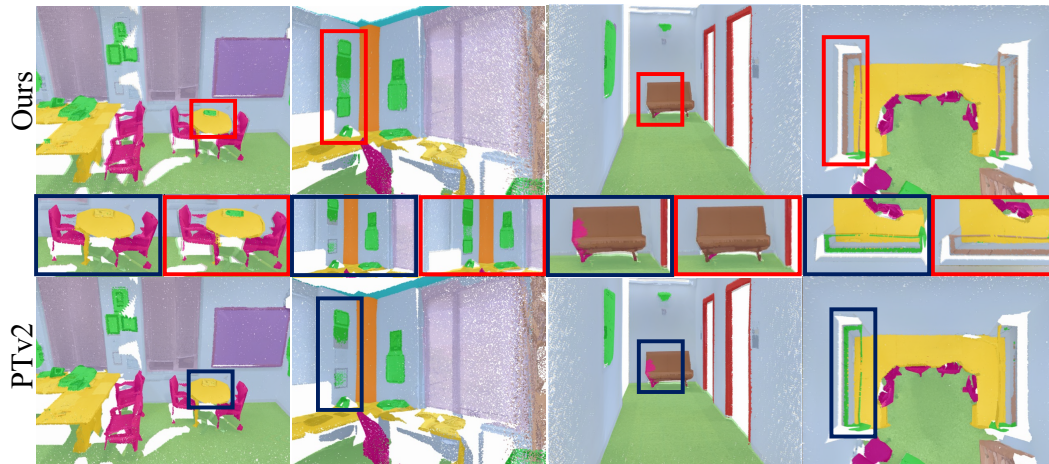

Figure 1: Qualitative semantic segmentation results of PTv2 [27] and PROTOSEG on S3DIS [1] Area 5. Red and blue bounding boxes represent the same zoom-in area on two methods, respectively.



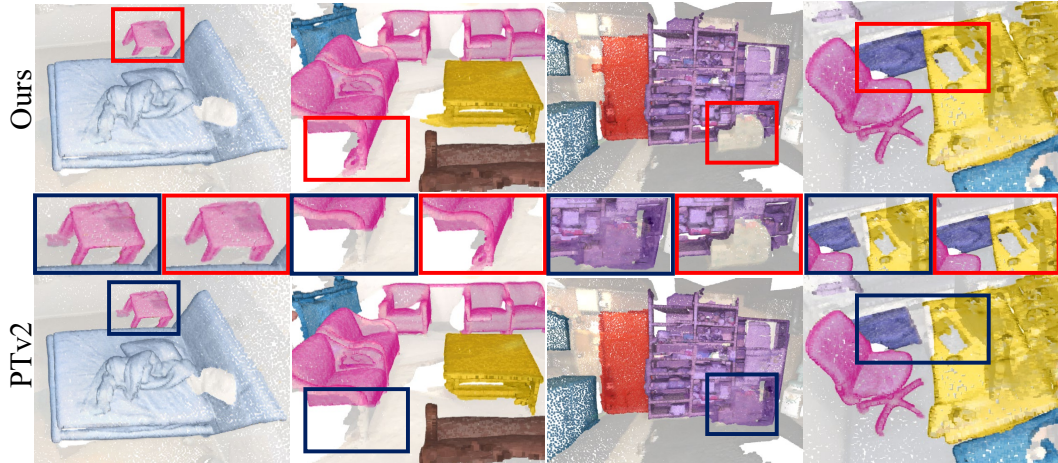

Figure 2: Qualitative semantic segmentation results of PTv2 [27] and PROTOSEG on ScanNet V2 [2] *test* set. Red and blue bounding boxes represent the same zoom-in area on two methods, respectively.

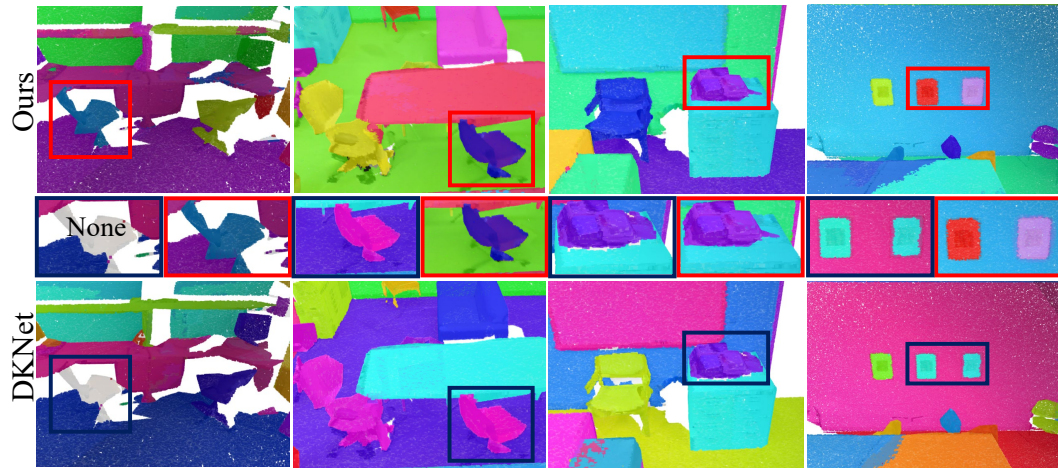

Figure 3: Qualitative instance segmentation results of DKNet [49] and PROTOSEG on S3DIS [1] Area 5. Red and blue bounding boxes represent the same zoom-in area on two methods, respectively.

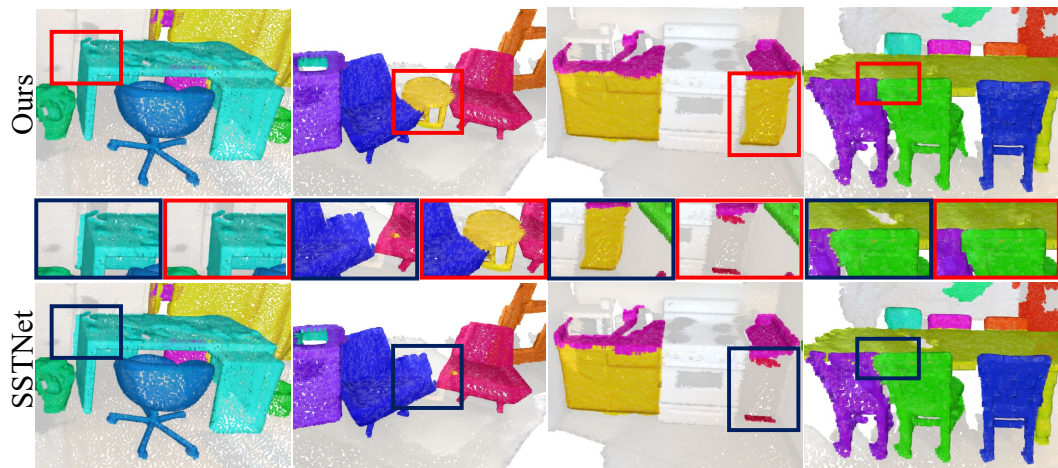

Figure 4: Qualitative instance segmentation results of SSTNet [46] and PROTOSEG on ScanNet V2 [2] *test* set. Red and blue bounding boxes represent the same zoom-in area, respectively.

Table 9: Analysis of computation efficiency on S3DIS [1] Area 5.

| Model     | mIoU | # Parameters | GfLOPs | # Epoch | Training speed (hour/epoch) | Inference speed |
|-----------|------|--------------|--------|---------|-----------------------------|-----------------|
| PTv2 [27] | 71.6 | 3.5m         | 6.8    | 100     | 0.160                       | 420 ms          |
| Our       | 72.3 | 3.5m         | 6.8    | 100     | 0.166                       | 404 ms          |

Inaccurate predictions in hands-on settings could risk safety. To mitigate any adverse impact, we recommend implementing a stringent security protocol should our method fail to operate as expected in real-world contexts. We will incorporate this discussion in our revised version.

**Future Work.** Building on above identified limitations, our future work will focus on several key areas. Firstly, we aim to explore more efficient stereotype associations to reduce time complexity, thereby enhancing the overall performance of our model. Additionally, we propose integrating our prototype-anchored classification mechanisms with large-scale models known for their interpretability. This integration is anticipated to augment the accuracy of our algorithm significantly.

To further improve the adaptability, we will investigate the application of our model to more complex open scenarios. These may include tasks such as shape segmentation, detection and tracking. By extending the application of our algorithm, we aim to ensure its utility in a broader range of contexts.

Finally, given the inherent similarity-/distance-based nature of our model, an additional area of focus will be to enhance its interpretability. The goal is to ensure our model’s decision-making processes are understandable, increasing its trustworthiness and usability and extending its potential for application in diverse real-world scenarios.

## References

- [1] Iro Armeni, Ozan Sener, Amir R Zamir, Helen Jiang, Ioannis Brilakis, Martin Fischer, and Silvio Savarese. 3d semantic parsing of large-scale indoor spaces. In *CVPR*, 2016.
- [2] Angela Dai, Angel X Chang, Manolis Savva, Maciej Halber, Thomas Funkhouser, and Matthias Nießner. Scannet: Richly-annotated 3d reconstructions of indoor scenes. In *CVPR*, 2017.
- [3] Jens Behley, Martin Garbade, Andres Milioto, Jan Quenzel, Sven Behnke, Cyrill Stachniss, and Jürgen Gall. Semantickitti: A dataset for semantic scene understanding of lidar sequences. In *ICCV*, 2019.
- [4] Charles R Qi, Hao Su, Kaichun Mo, and Leonidas J Guibas. Pointnet: Deep learning on point sets for 3d classification and segmentation. In *CVPR*, 2017.
- [5] Lyne Tchapmi, Christopher Choy, Iro Armeni, JunYoung Gwak, and Silvio Savarese. Segcloud: Semantic segmentation of 3d point clouds. In *3DV*, 2017.
- [6] Maxim Tatarchenko, Jaesik Park, Vladlen Koltun, and Qian-Yi Zhou. Tangent convolutions for dense prediction in 3d. In *CVPR*, 2018.
- [7] Yangyan Li, Rui Bu, Mingchao Sun, Wei Wu, Xinhan Di, and Baoquan Chen. Pointcnn: Convolution on x-transformed points. *NeurIPS*, 2018.
- [8] Hengshuang Zhao, Li Jiang, Chi-Wing Fu, and Jiaya Jia. Pointweb: Enhancing local neighborhood features for point cloud processing. In *CVPR*, 2019.
- [9] Li Jiang, Hengshuang Zhao, Shu Liu, Xiaoyong Shen, Chi-Wing Fu, and Jiaya Jia. Hierarchical point-edge interaction network for point cloud semantic segmentation. In *ICCV*, 2019.
- [10] Lei Wang, Yuchun Huang, Yaolin Hou, Shenman Zhang, and Jie Shan. Graph attention convolution for point cloud semantic segmentation. In *CVPR*, 2019.
- [11] Jiancheng Yang, Qiang Zhang, Bingbing Ni, Linguo Li, Jinxian Liu, Mengdie Zhou, and Qi Tian. Modeling point clouds with self-attention and gumbel subset sampling. In *CVPR*, 2019.
- [12] Shenlong Wang, Simon Suo, Wei-Chiu Ma, Andrei Pokrovsky, and Raquel Urtasun. Deep parametric continuous convolutional neural networks. In *CVPR*, 2018.
- [13] Loic Landrieu and Martin Simonovsky. Large-scale point cloud semantic segmentation with superpoint graphs. In *CVPR*, 2018.

- [14] Xinlong Wang, Shu Liu, Xiaoyong Shen, Chunhua Shen, and Jiaya Jia. Associatively segmenting instances and semantics in point clouds. In *CVPR*, 2019.
- [15] Lin Zhao and Wenbing Tao. Jsnet: Joint instance and semantic segmentation of 3d point clouds. In *AAAI*, 2020.
- [16] Loic Landrieu and Mohamed Boussaha. Point cloud oversegmentation with graph-structured deep metric learning. In *CVPR*, 2019.
- [17] Huan Lei, Naveed Akhtar, and Ajmal Mian. Seggcn: Efficient 3d point cloud segmentation with fuzzy spherical kernel. In *CVPR*, 2020.
- [18] Siqi Fan, Qiulei Dong, Fenghua Zhu, Yisheng Lv, Peijun Ye, and Fei-Yue Wang. Scf-net: Learning spatial contextual features for large-scale point cloud segmentation. In *CVPR*, 2021.
- [19] Christopher Choy, JunYoung Gwak, and Silvio Savarese. 4d spatio-temporal convnets: Minkowski convolutional neural networks. In *CVPR*, 2019.
- [20] Mutian Xu, Runyu Ding, Hengshuang Zhao, and Xiaojuan Qi. Paconv: Position adaptive convolution with dynamic kernel assembling on point clouds. In *CVPR*, 2021.
- [21] Hugues Thomas, Charles R Qi, Jean-Emmanuel Deschaud, Beatriz Marcotegui, François Goulette, and Leonidas J Guibas. Kpconv: Flexible and deformable convolution for point clouds. In *ICCV*, 2019.
- [22] Haoxi Ran, Jun Liu, and Chengjie Wang. Surface representation for point clouds. In *CVPR*, 2022.
- [23] Liyao Tang, Yibing Zhan, Zhe Chen, Baosheng Yu, and Dacheng Tao. Contrastive boundary learning for point cloud segmentation. In *CVPR*, 2022.
- [24] Hengshuang Zhao, Li Jiang, Jiaya Jia, Philip Torr, and Vladlen Koltun. Point transformer. In *ICCV*, 2021.
- [25] Chungyun Park, Yoonwoo Jeong, Minsu Cho, and Jaesik Park. Fast point transformer. In *CVPR*, 2022.
- [26] Jaesung Choe, Chungyun Park, Francois Rameau, Jaesik Park, and In So Kweon. Pointmixer: Mlp-mixer for point cloud understanding. In *ECCV*, 2022.
- [27] Xiaoyang Wu, Yixing Lao, Li Jiang, Xihui Liu, and Hengshuang Zhao. Point transformer v2: Grouped vector attention and partition-based pooling. In *NeurIPS*, 2022.
- [28] Xin Lai, Jianhui Liu, Li Jiang, Liwei Wang, Hengshuang Zhao, Shu Liu, Xiaojuan Qi, and Jiaya Jia. Stratified transformer for 3d point cloud segmentation. In *CVPR*, 2022.
- [29] Junjie Zhou, Yongping Xiong, Chinwai Chiu, Fangyu Liu, and Xiangyang Gong. Sat: Size-aware transformer for 3d point cloud semantic segmentation. *arXiv preprint arXiv:2301.06869*, 2023.
- [30] Charles Ruizhongtai Qi, Li Yi, Hao Su, and Leonidas J Guibas. Pointnet++: Deep hierarchical feature learning on point sets in a metric space. *NeurIPS*, 2017.
- [31] Angela Dai and Matthias Nießner. 3dmv: Joint 3d-multi-view prediction for 3d semantic scene segmentation. In *ECCV*, 2018.
- [32] Gaku Narita, Takashi Seno, Tomoya Ishikawa, and Yohsuke Kaji. Panopticfusion: Online volumetric semantic mapping at the level of stuff and things. In *IROS*, 2019.
- [33] Wenxuan Wu, Zhongang Qi, and Li Fuxin. Pointconv: Deep convolutional networks on 3d point clouds. In *CVPR*, 2019.
- [34] Xu Yan, Chaoda Zheng, Zhen Li, Sheng Wang, and Shuguang Cui. Pointasnl: Robust point clouds processing using nonlocal neural networks with adaptive sampling. In *CVPR*, 2020.
- [35] Hung-Yueh Chiang, Yen-Liang Lin, Yueh-Cheng Liu, and Winston H Hsu. A unified point-based framework for 3d segmentation. In *3DV*, 2019.
- [36] Qingyong Hu, Bo Yang, Linhai Xie, Stefano Rosa, Yulan Guo, Zhihua Wang, Niki Trigoni, and Andrew Markham. Randla-net: Efficient semantic segmentation of large-scale point clouds. In *CVPR*, 2020.
- [37] Haoxi Ran, Wei Zhuo, Jun Liu, and Li Lu. Learning inner-group relations on point clouds. In *ICCV*, 2021.
- [38] Zeyu Hu, Mingmin Zhen, Xuyang Bai, Hongbo Fu, and Chiew-lan Tai. Jsenet: Joint semantic segmentation and edge detection network for 3d point clouds. In *ECCV*, 2020.

- [39] Feihu Zhang, Jin Fang, Benjamin Wah, and Philip Torr. Deep fusionnet for point cloud semantic segmentation. In *ECCV*, 2020.
- [40] Benjamin Graham, Martin Engelcke, and Laurens van der Maaten. 3d semantic segmentation with submanifold sparse convolutional networks. In *CVPR*, 2018.
- [41] Guocheng Qian, Yuchen Li, Houwen Peng, Jinjie Mai, Hasan Hammoud, Mohamed Elhoseiny, and Bernard Ghanem. Pointnext: Revisiting pointnet++ with improved training and scaling strategies. *NeurIPS*, 2022.
- [42] Weiyue Wang, Ronald Yu, Qiangui Huang, and Ulrich Neumann. Sgpn: Similarity group proposal network for 3d point cloud instance segmentation. In *CVPR*, 2018.
- [43] Bo Yang, Jianan Wang, Ronald Clark, Qingyong Hu, Sen Wang, Andrew Markham, and Niki Trigoni. Learning object bounding boxes for 3d instance segmentation on point clouds. In *NeurIPS*, 2019.
- [44] Li Jiang, Hengshuang Zhao, Shaoshuai Shi, Shu Liu, Chi-Wing Fu, and Jiaya Jia. Pointgroup: Dual-set point grouping for 3d instance segmentation. In *CVPR*, 2020.
- [45] Min Zhong, Xinghao Chen, Xiaokang Chen, Gang Zeng, and Yunhe Wang. Maskgroup: Hierarchical point grouping and masking for 3d instance segmentation. In *ICME*, 2022.
- [46] Zhihao Liang, Zhihao Li, Songcen Xu, Mingkui Tan, and Kui Jia. Instance segmentation in 3d scenes using semantic superpoint tree networks. In *ICCV*, 2021.
- [47] Tong He, Chunhua Shen, and Anton Van Den Hengel. Dyco3d: Robust instance segmentation of 3d point clouds through dynamic convolution. In *CVPR*, 2021.
- [48] Shaoyu Chen, Jiemin Fang, Qian Zhang, Wenyu Liu, and Xinggang Wang. Hierarchical aggregation for 3d instance segmentation. In *ICCV*, 2021.
- [49] Yizheng Wu, Min Shi, Shuaiyuan Du, Hao Lu, Zhiguo Cao, and Weicai Zhong. 3d instances as 1d kernels. In *ECCV*, 2022.
- [50] Li Yi, Wang Zhao, He Wang, Minhyuk Sung, and Leonidas J Guibas. Gspn: Generative shape proposal network for 3d instance segmentation in point cloud. In *CVPR*, 2019.
- [51] Ji Hou, Angela Dai, and Matthias Nießner. 3d-sis: 3d semantic instance segmentation of rgb-d scans. In *CVPR*, 2019.
- [52] Jean Lahoud, Bernard Ghanem, Marc Pollefeys, and Martin R Oswald. 3d instance segmentation via multi-task metric learning. In *ICCV*, 2019.
- [53] Francis Engelmann, Martin Bokeloh, Alireza Fathi, Bastian Leibe, and Matthias Nießner. 3d-mpa: Multi-proposal aggregation for 3d semantic instance segmentation. In *CVPR*, 2020.
- [54] Lei Han, Tian Zheng, Lan Xu, and Lu Fang. Occuseg: Occupancy-aware 3d instance segmentation. In *CVPR*, 2020.
- [55] Thang Vu, Kookhoi Kim, Tung M Luu, Thanh Nguyen, and Chang D Yoo. Softgroup for 3d instance segmentation on point clouds. In *CVPR*, 2022.
- [56] Plamen Angelov and Eduardo Soares. Towards explainable deep neural networks (xdnn). *Neural Networks*, 130:185–194, 2020.



---

**Algorithm 1** Pseudo-code of PROTOSEG in a PyTorch-like style.

---

```
# P: prototypes (C x K x D)
# E: point embeddings (N x D)

# C: number of classes
# K: number of prototypes for each class
# S: sinhorn-knopp iteration number
# kappa (Eq.9), mu (Eq.12), tau (Eq.13), alphe, beta (Eq.16): hyper-parameters

def ProtoSEG(E, P, label)
    ==# Model Prediction and Training Loss (Eq.7) ==#
    # point-to-prototype assignment (N x K x C, Eq.5)
    M = torch.einsum('nd,ckd->nkc', E, P) # permutation matrix (C x K x N)
    output = torch.amax(M, dim=1)

    # training loss
    PPS_loss = -torch.log(F.softmax(M / tau, dim=-1)) # Eq. 13
    PPC_loss = torch.pow(1 - output, 2) # Eq. 14
    PCS_loss = CrossEntropyLoss(output, label) # Eq. 15
    total_loss = PCS_loss + alpha * PPS_loss.mean() + beta * PPC_loss.mean()

    ==# Prototype Association (Eq.10) and Update (Eq.12) ==#
    for c in range(C)
        M*_c = prototype_association(M*_c, S) # M*_c (K x N*_c)
        P = prototype_update(E, M, P, M*_c, c)

    return total_loss

def prototype_association(M*_c, S)
    M*_c = torch.exp(M*_c / kappa)
    M*_c /= torch.sum(M*_c)

    for _ in range(S):
        # normalize each row
        M*_c /= torch.sum(M*_c, dim=1, keepdim=True)
        M*_c /= K
        # normalize each column
        M*_c /= torch.sum(M*_c, dim=0, keepdim=True)
        M*_c /= N*_c
    # make sure the sum of each column to be 1
    M*_c *= N*_c

    return one_hot(M*_c)

def prototype_update(E, M, P, M*_c, c)
    # assignments and embeddings for points in class c
    m*_c = M[label == c]
    e*_c = E[label == c, ...]

    # find points that are assigned to each prototype and correctly classified
    m*_c_tile = repeat(m*_c, tile=K)
    m*_q = M*_c * m*_c_tile

    # find points with label c that are correctly classified
    e*_c_tile = repeat(m*_c, tile=e*_c.shape[-1])
    e*_c_q = e*_c * e*_c_tile
    f = torch.mm(m*_q.transpose(), e*_c_q)

    # num assignments for each prototype of class c
    n = torch.sum(m*_q, dim=0)

    # calibration factor
    p*_d = torch.mm(e*_c_q.transpose(), P[c, n != 0, :])
    w*_c = torch.sigmoid(p*_d)

    # momentum update (Eq.8)
    if torch.sum(n) > 0:
        P*_c = mu * P[c, n != 0, :] + w*_c * (1-mu) * f[n != 0, :]
        P[c, n != 0, :] = P*_c

    return P
```

---
